# Supplementary material for: Dynamic remodeling of histone modifications in response to osmotic stress in Saccharomyces cerevisiae
Source: PubMed Central journal article supplement (PMC3986647; doi:10.1186/1471-2164-15-247), 2014-03-30

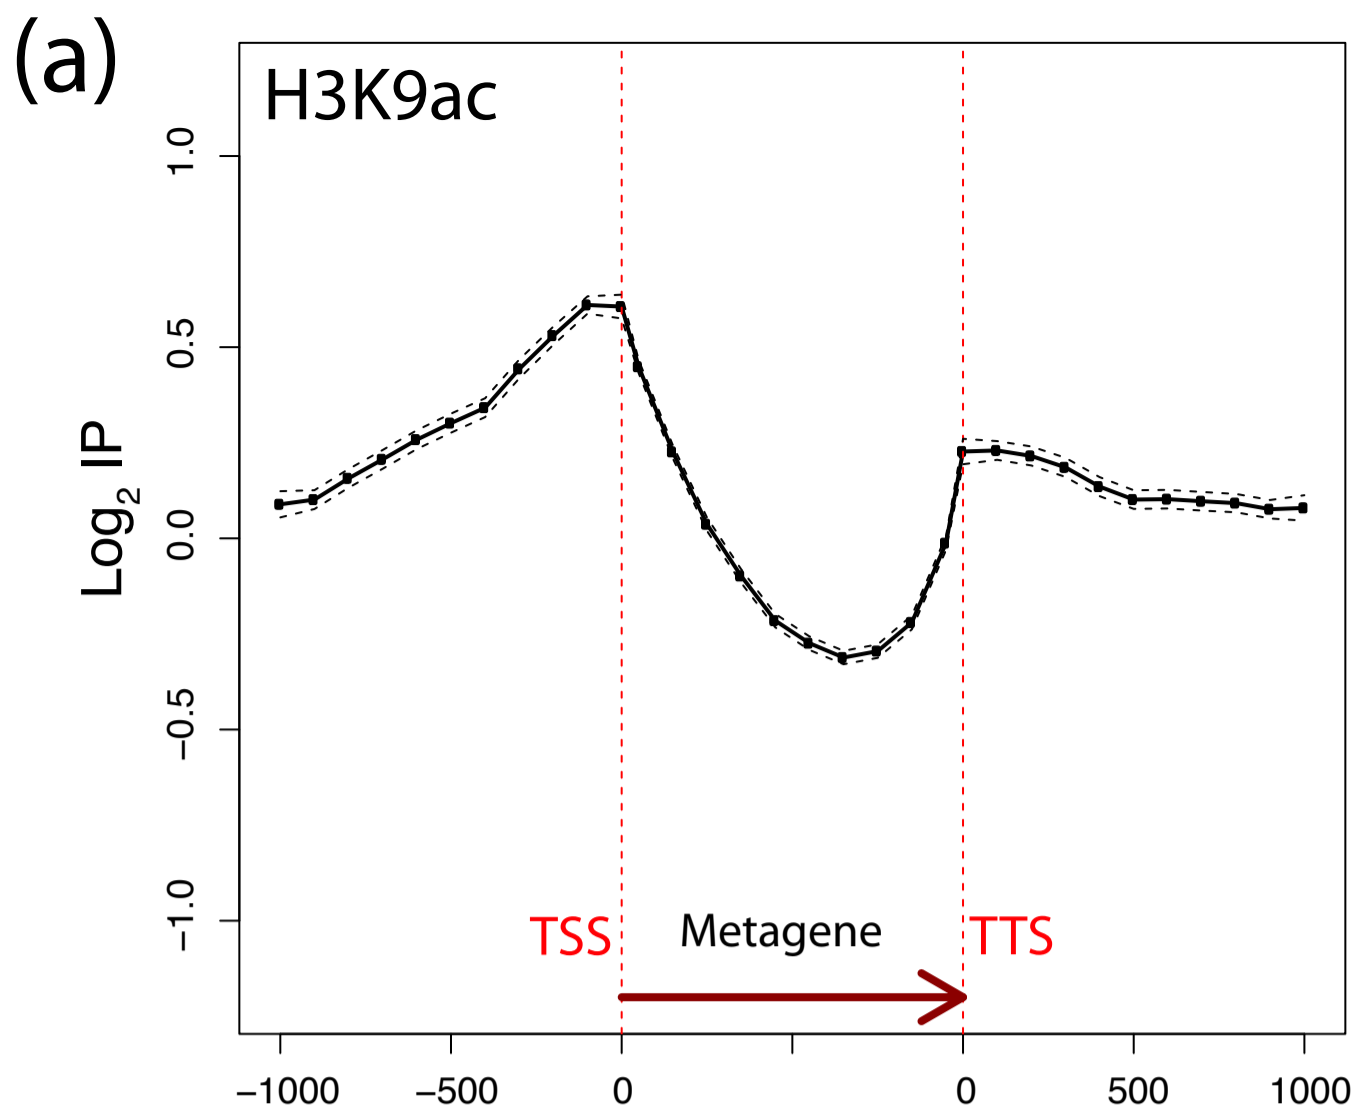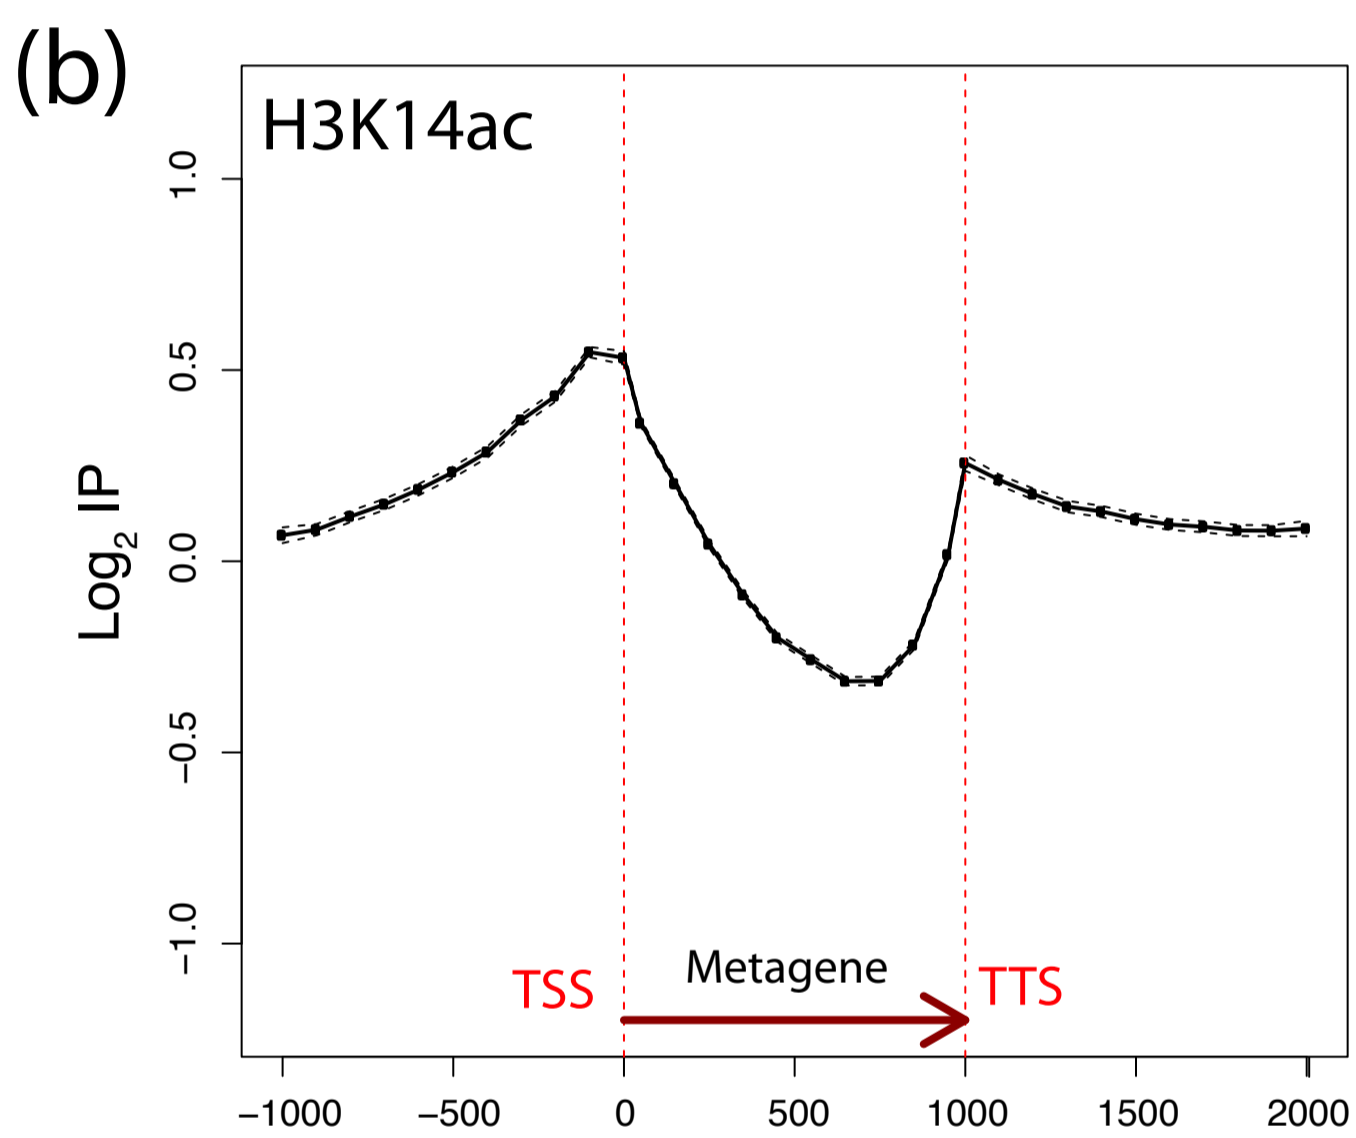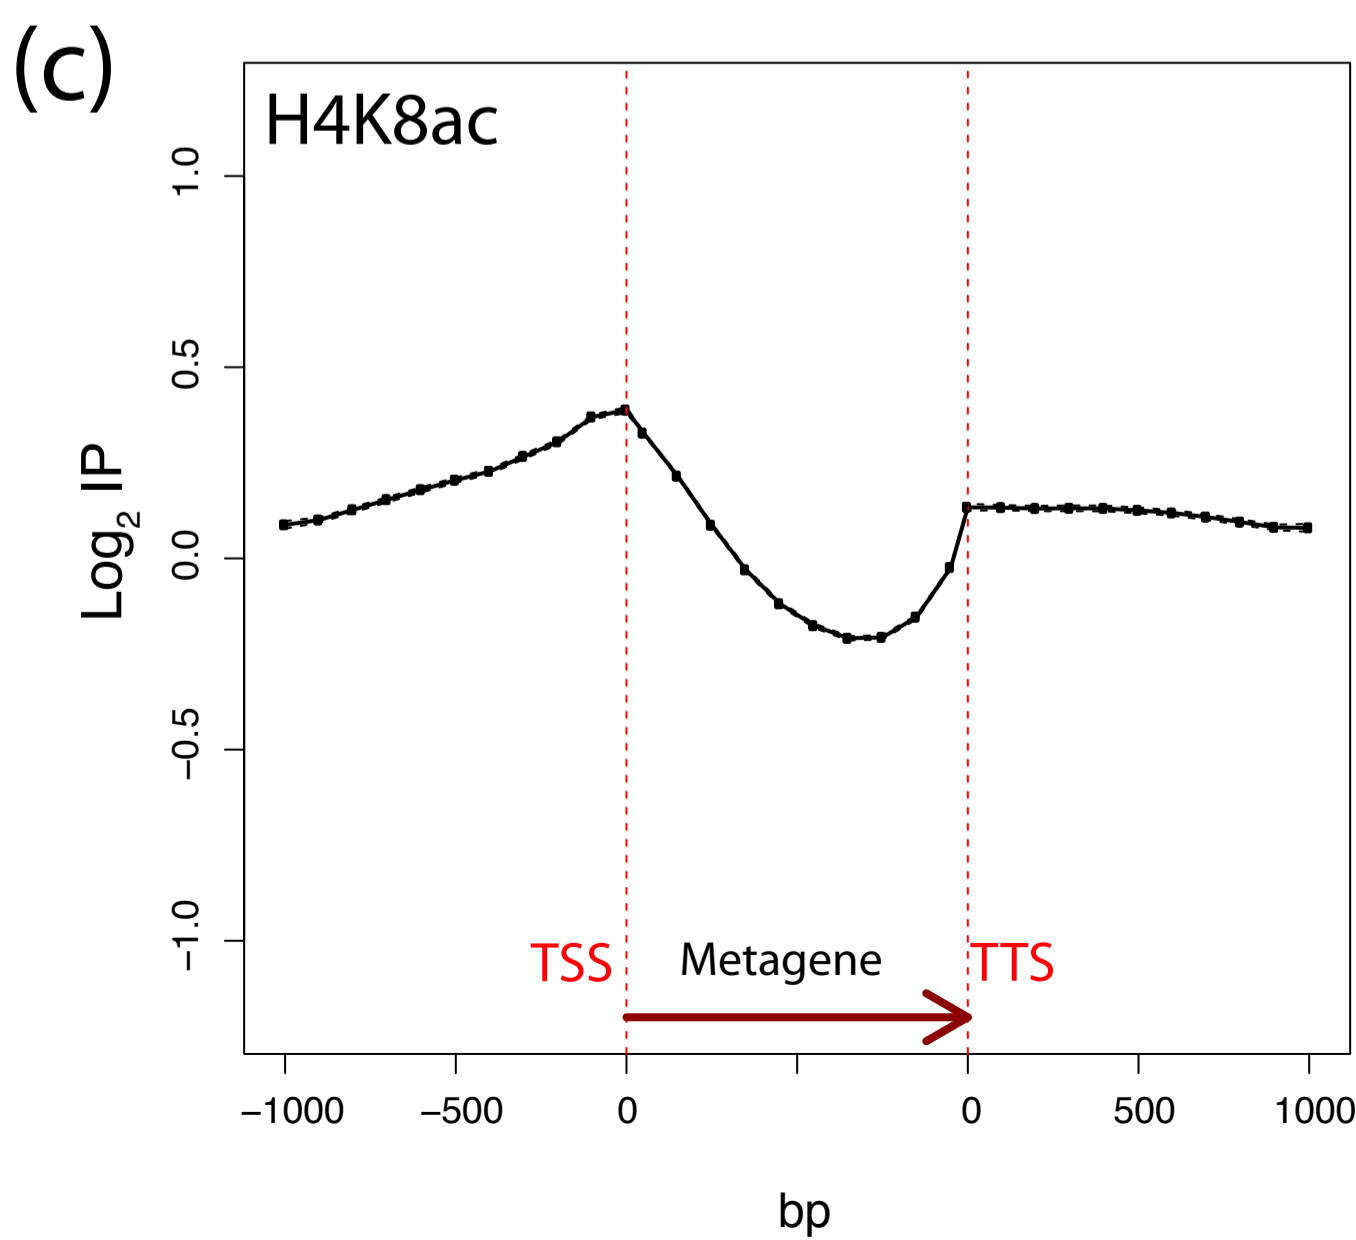

Supplement: 12864_2013_5905_MOESM1_ESM.pdf [file 12864_2013_5905_MOESM1_ESM.pdf]
